# Supplementary material for: Operando and ex situ Raman spectroscopies for evaluating carbon structural changes in anode-free-type sulfide-based all-solid-state Li-ion batteries
Source: Royal Society of Chemistry journal article supplement (doi:10.1039/d5ta02406d), 2025-01-01
Supplement: d5ta02406d1.pdf [file d5ta02406d1.pdf]

*Electronic Supplementary Information*

***Operando and Ex-situ Raman Spectroscopies for Evaluating Carbon Structural Changes in Anode-Free-Type Sulfide-Based All-Solid-State Li Battery***

*Koji Hiraoka,<sup>a</sup> Junichi Sakabe,<sup>b</sup> Naoki Suzuki,<sup>b,\*</sup> and Shiro Seki<sup>a,\*</sup>*

<sup>a</sup> Graduate School of Applied Chemistry and Chemical Engineering, School of Advanced Engineering, Kogakuin University, 2665-1 Nakano-machi, Hachioji, Tokyo 192-0015, Japan

<sup>b</sup> Samsung Device Solutions R&D Japan, Samsung Japan Co., 2-1-11, Semba-Nishi, Minoh, Osaka 562-0036, Japan.

\*To whom correspondence should be addressed, E-mail: shiro-seki@cc.kogakuin.ac.jp (Dr. S. Seki), n.suzuki@samsung.com (Dr. N. Suzuki)

Fax: +81-42-628-4568; Tel.: +81-42-628-4568

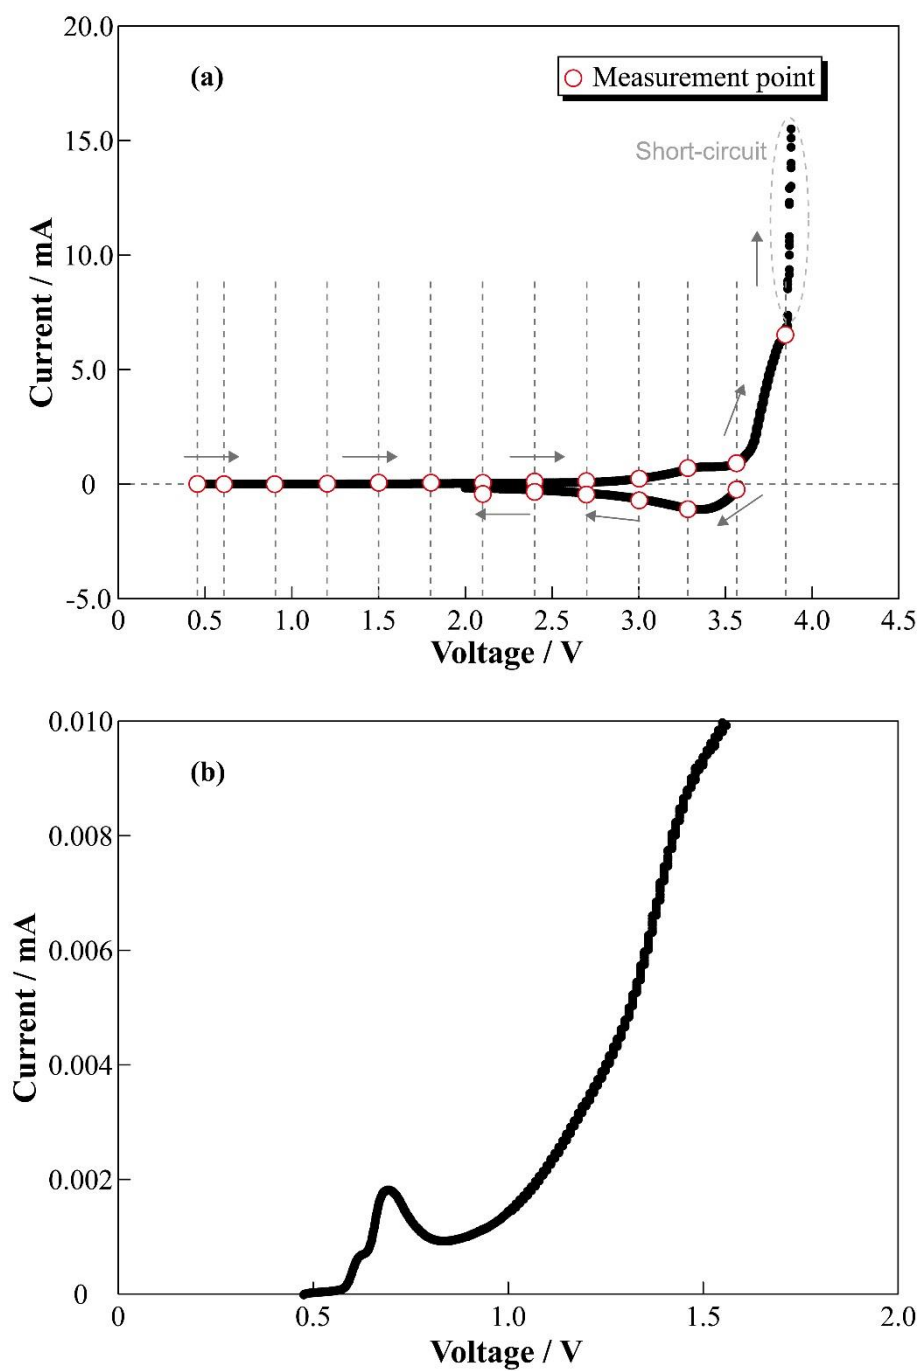

**Fig. S1.** The electrochemical profiles for CV measurement in the range of 0–4.5 V (a) and 0–2.0 V during *Operando* Raman spectroscopy.

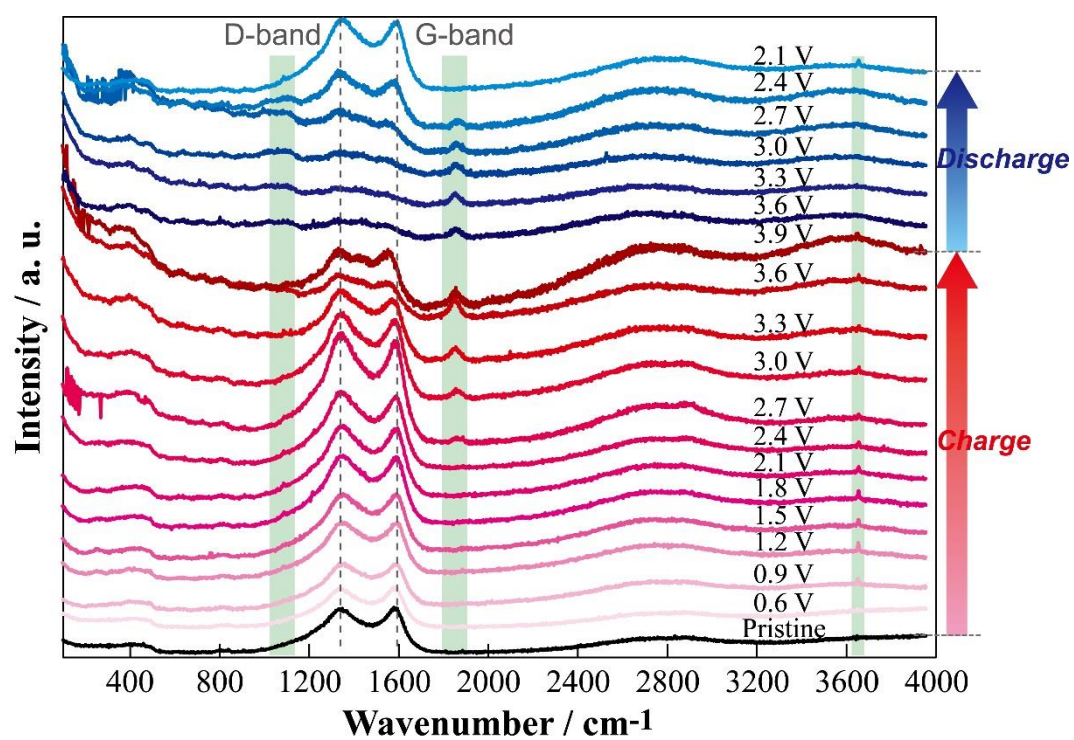

**Fig. S2** The Raman spectra acquired from point 2 in the cross-sectional AF-ASSB with the Ag/C layer every 0.3 V during charge-discharge processes in the *Operando* Raman spectroscopy at room temperature.

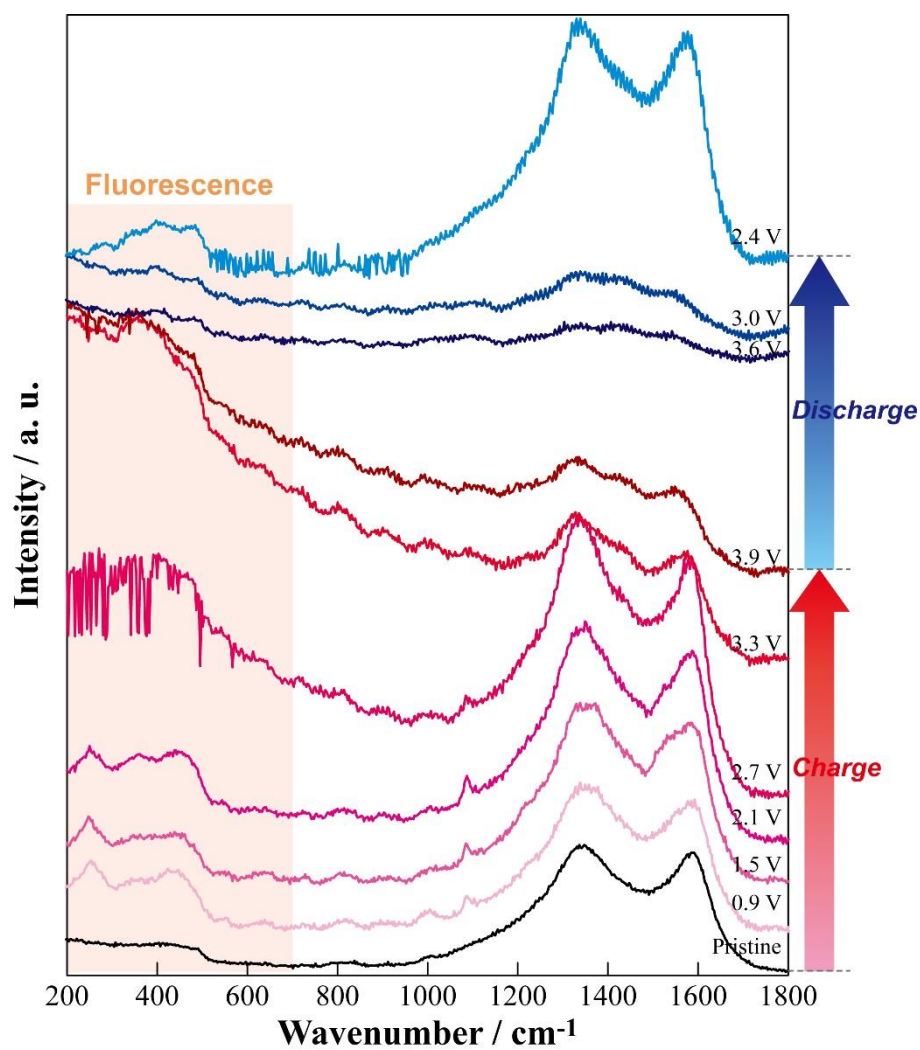

**Fig. S3** The Raman spectra in the range of 200–1800 cm<sup>-1</sup> at point 1 during the *Operando* Raman spectroscopy. The fluorescence signal is indicated as orange region in the lower wavenumber.

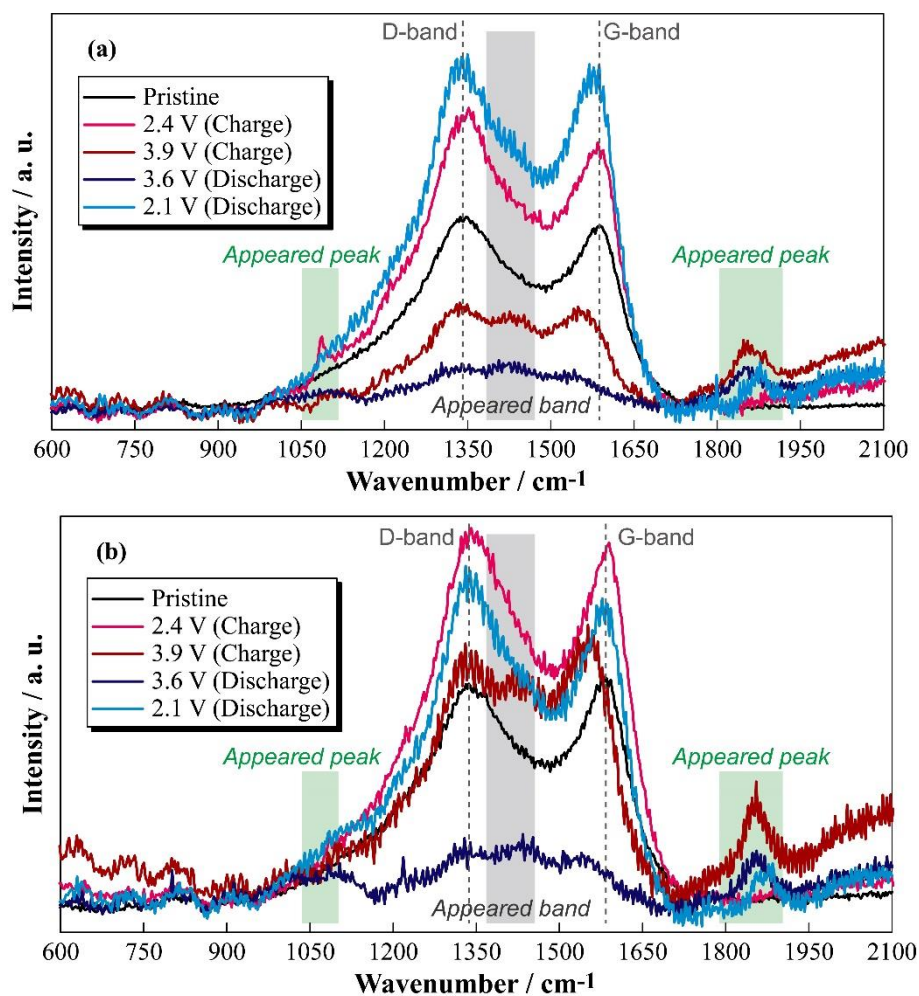

**Fig. S4.** The baseline corrected Raman spectra in the range of 600–2100  $\text{cm}^{-1}$  acquired from point 1 (a) and point 2 (b) in the Ag/C layer during *Operando* Raman spectroscopy.

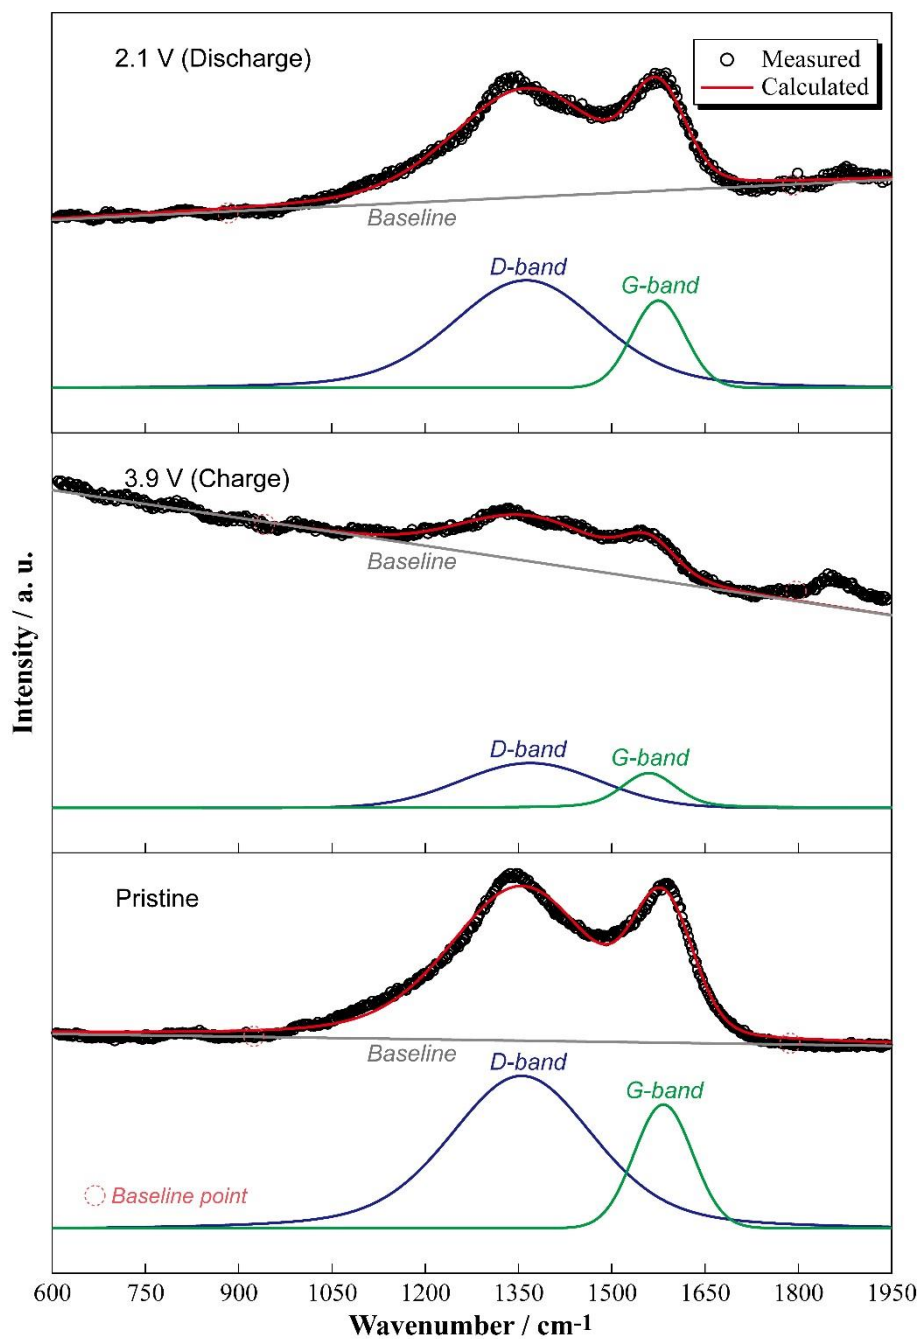

**Fig. S5.** The curve fitted Raman spectra in the range of 600–1950 cm<sup>-1</sup> at a pristine, 3.9 (charge) and 2.1 (discharge) V acquired from the Ag/C layer during *Operando* Raman spectroscopy in point 1.

## D- and G-bands in carbon materials<sup>S1-S4</sup>

In almost carbon materials, Raman spectra exhibit the D- and G-bands around 1360 and 1580  $\text{cm}^{-1}$ , respectively. For example, graphite with ideal structure consisting of  $sp^2$  orbital (e.g. Highly oriented pyrolytic graphite; HOPG) has quite intense peak approximately 1580  $\text{cm}^{-1}$ , derived from the symmetric motion (lattice vibration) of C atoms inner graphene plane ( $E_{2g}$ ), namely as G-band. With increasing the defects (correspondence to  $sp^3$  orbital), Raman spectrum appear the new peak approximately 1360  $\text{cm}^{-1}$ , due to induce the disordered structure and lattice vibration inside and edge of the graphene plane, close to the diamond-like structure and phonon state ( $T_{2g}$ ). In addition, disordered structure also induces the D2-band around 1620  $\text{cm}^{-1}$  with a weak shoulder on the G-band, corresponding to the symmetric motion of graphitic lattice ( $E_{2g}$ ). The amorphous carbon with the soot (organic molecule, fragment or functional group) have been proposed the existence of the D3-band around 1500  $\text{cm}^{-1}$ , originated from the distribution of amorphous phase in the disturbed graphitic lattice. In case of existence peak around 1200  $\text{cm}^{-1}$  with a shoulder on D-band, namely as D4-band, this may attribute to flame soot and tentatively originating from the  $sp^2$ - $sp^3$  bonds or C–C and C=C stretching vibrations of polyene-like structures. Thus, the D-bands and G-band plays role as index of disorder and defects in the carbon materials. However, these D2-, D3-, and D4-bands are often quite weak Raman active and hidden in the intense and broad D-band. In particular, Raman spectra in this *Operando* measurement is lower S/N ratio and weak intensity due to their short acquisition time and porously Ag/C layer in the cross-section. Indeed, the D2-, D3-, and D4-band was not clear observed, even though the use of the amorphously CB with much defects. From this reason, the curve fitting calculation in this study was performed as 2 components of D- and G-bands only.

From the feature of D-band, intensity ratio (D-band/G-band) is sometimes used as a  $R$  value reflecting the structural regularity and amount of defect in the carbon materials. The  $R$  values was reported to correlate on the crystallite size ( $L_a$ ) measured by the XRD. Although the  $R$  value is sensitive for the sample surface and excitation wavelength, this may increase with decreasing the  $L_a$ . Therefore, various hypothesis is related on the Raman spectrum in the carbon material, however peak shape

(aspect ratio) and  $R$  value defined in following Fig. S5 is expected to indicate the structural changes in the CB during the charge-discharge.

## References

- S1 A. Ferrari, J. Robertson, *Phys. Rev. B*, 2000, **61**, 14095-14107.
- S2 A. Ferrari, *Solid State Commun.*, 2007, **143**, 47-45.
- S3 A. Sadezky, H. Muckenhuber, H. Grothe, H., R. Niessner, U. Pöschl, *Carbon*, 2005, **43**, 1731-1742.
- S4 K. K. Mani, R. Ramani, *Phys. Stat. Sol.*, 1974, **61**, 659-669.



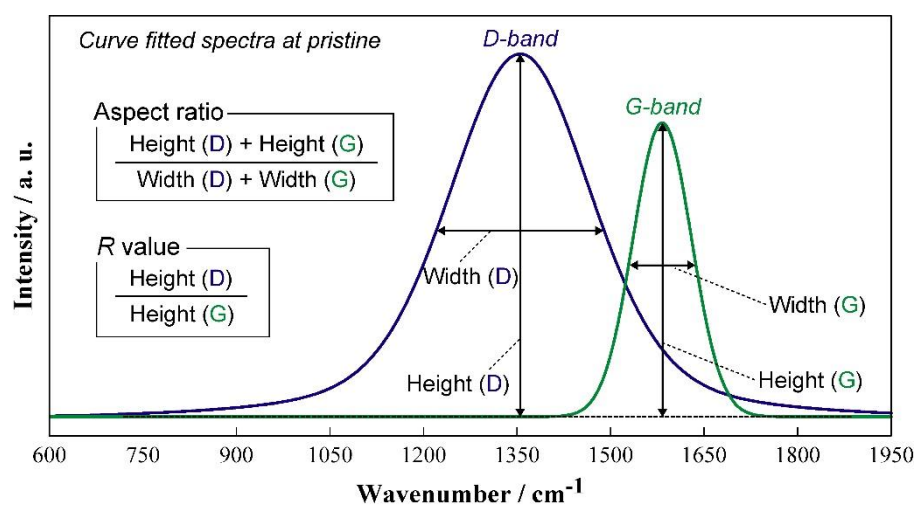

**Fig. S6** Schematic image of definition in an aspect ratio and *R* value in this study.

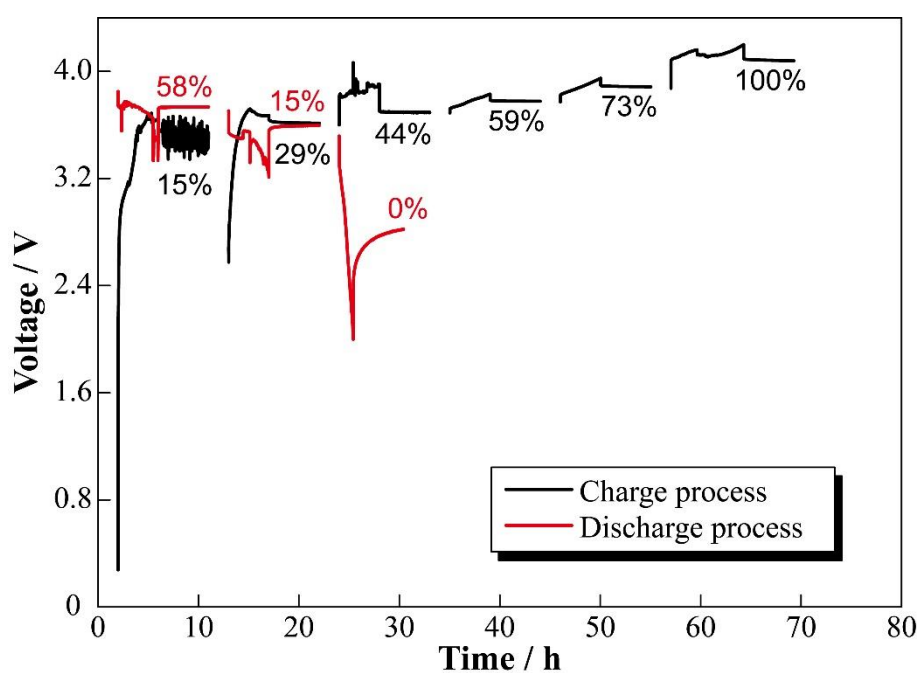

**Fig. S7.** The charge-discharge profile in the *ex-situ* Raman spectroscopy (percentages indicate SOC). The curve and flat regions in the voltage profiles are constant-current charge-discharge and open-circuit periods, respectively.

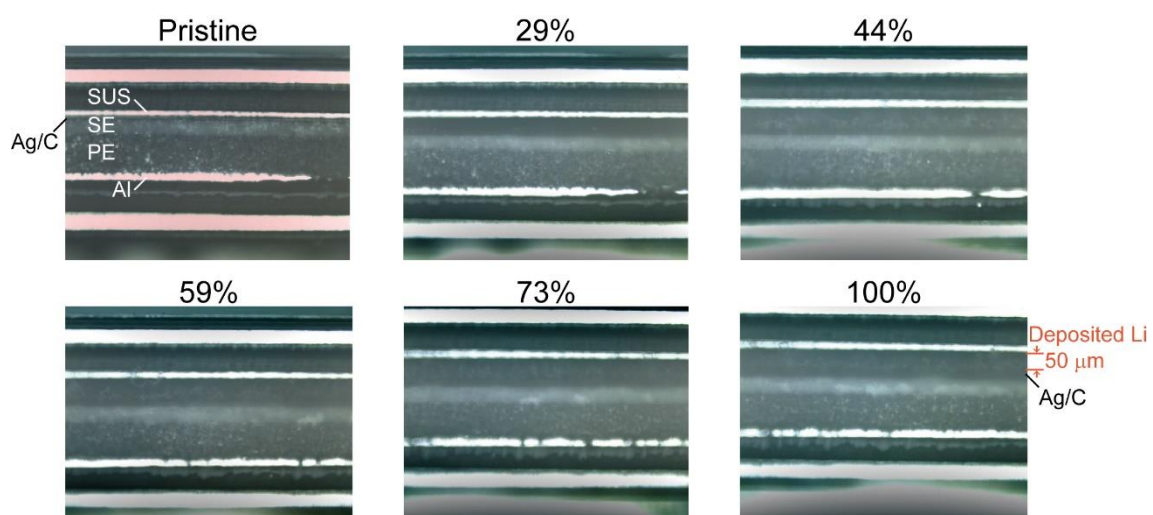

**Fig. S8.** The microscopic images from the cross-sectional AF-ASSB with Ag/C layer in the *ex-situ* Raman spectroscopy, indicating clear deposited Li layer between Ag/C layer and SUS current collector.

**Table S1** Calculated parameters in curve fitting analysis based on *pseudo*-Voigt function at point 1

|                   | D-band     |                             |                          |                   | G-band     |                             |                          |                   |
|-------------------|------------|-----------------------------|--------------------------|-------------------|------------|-----------------------------|--------------------------|-------------------|
|                   | Height / - | Position / cm <sup>-1</sup> | Width / cm <sup>-1</sup> | Lorentz ratio / - | Height / - | Position / cm <sup>-1</sup> | Width / cm <sup>-1</sup> | Lorentz ratio / - |
| Pristine          | 379.3      | 1355.1                      | 158.4                    | 0.35              | 303.2      | 1582.9                      | 66.4                     | 0                 |
| 0.6 V (Charge)    | 184.2      | 1358.1                      | 144.4                    | 0.44              | 150.2      | 1583.9                      | 70.4                     | 0                 |
| 0.9 V (Charge)    | 446.5      | 1360.7                      | 155.2                    | 0.26              | 339.2      | 1581.0                      | 68.7                     | 0                 |
| 1.2 V (Charge)    | 503.4      | 1360.0                      | 148.4                    | 0.28              | 403.1      | 1581.0                      | 66.5                     | 0                 |
| 1.5 V (Charge)    | 550.8      | 1361.0                      | 156.7                    | 0.17              | 428.0      | 1577.5                      | 68.3                     | 0                 |
| 1.8 V (Charge)    | 600.0      | 1359.0                      | 144.2                    | 0.39              | 459.8      | 1580.1                      | 67.4                     | 0                 |
| 2.1 V (Charge)    | 627.7      | 1359.2                      | 151.2                    | 0.25              | 494.0      | 1579.3                      | 66.0                     | 0                 |
| 2.4 V (Charge)    | 578.8      | 1359.0                      | 158.7                    | 0.22              | 443.2      | 1580.2                      | 64.4                     | 0                 |
| 2.7 V (Charge)    | 710.6      | 1360.3                      | 156.2                    | 0.12              | 575.8      | 1577.2                      | 60.8                     | 0                 |
| 3.0 V (Charge)    | 444.1      | 1362.2                      | 141.7                    | 0.37              | 362.5      | 1575.4                      | 61.2                     | 0                 |
| 3.3 V (Charge)    | 262.44     | 1365.9                      | 126.3                    | 0.13              | 235.5      | 1565.9                      | 64.8                     | 0                 |
| 3.6 V (Charge)    | 114.7      | 1368.8                      | 106.1                    | 0                 | 109.84     | 1558.8                      | 73.5                     | 0                 |
| 3.9 V (Charge)    | 202.6      | 1368.5                      | 157.3                    | 0                 | 157.1      | 1559.6                      | 59.4                     | 0.31              |
| 3.6 V (Discharge) | 90.7       | 1379.8                      | 152.3                    | 1                 | 24.5       | 1540.5                      | 45.5                     | 0                 |
| 3.3 V (Discharge) | 115.9      | 1381.7                      | 141.1                    | 0.87              | 36.7       | 1541.9                      | 58.8                     | 0                 |
| 3.0 V (Discharge) | 173.5      | 1379.9                      | 150.0                    | 0.81              | 52.0       | 1547.8                      | 59.2                     | 0                 |
| 2.7 V (Discharge) | 195.7      | 1375.5                      | 138.6                    | 1                 | 86.9       | 1556.3                      | 60.8                     | 0                 |
| 2.4 V (Discharge) | 550.6      | 1365.2                      | 152.9                    | 0.43              | 385.9      | 1572.0                      | 62.2                     | 0                 |
| 2.1 V (Discharge) | 686.8      | 1362.4                      | 163.0                    | 0.29              | 550.3      | 1575.0                      | 60.6                     | 0                 |

**Table S2** Calculated parameters in curve fitting analysis based on *pseudo*-Voigt function at point 2

|                   | D-band     |                             |                          |                   | G-band     |                             |                          |                   |
|-------------------|------------|-----------------------------|--------------------------|-------------------|------------|-----------------------------|--------------------------|-------------------|
|                   | Height / - | Position / cm <sup>-1</sup> | Width / cm <sup>-1</sup> | Lorentz ratio / - | Height / - | Position / cm <sup>-1</sup> | Width / cm <sup>-1</sup> | Lorentz ratio / - |
| Pristine          | 215.6      | 1349.5                      | 157.7                    | 0.31              | 191.1      | 1579.5                      | 67.2                     | 0                 |
| 0.6 V (Charge)    | 188.6      | 1350.2                      | 160.5                    | 0.26              | 171.3      | 1580.2                      | 66.7                     | 0.04              |
| 0.9 V (Charge)    | 212.3      | 1356.4                      | 156.6                    | 0.10              | 183.6      | 1581.9                      | 75.5                     | 0                 |
| 1.2 V (Charge)    | 267.3      | 1361.1                      | 165.2                    | 0.21              | 218.0      | 1586.3                      | 68.1                     | 0                 |
| 1.5 V (Charge)    | 303.0      | 1362.4                      | 164.1                    | 0.29              | 240.4      | 1585.9                      | 66.7                     | 0                 |
| 1.8 V (Charge)    | 347.7      | 1361.2                      | 167.7                    | 0.15              | 283.4      | 1587.0                      | 65.9                     | 0                 |
| 2.1 V (Charge)    | 355.9      | 1358.9                      | 163.7                    | 0.20              | 291.0      | 1585.4                      | 65.6                     | 0                 |
| 2.4 V (Charge)    | 367.0      | 1356.3                      | 160.7                    | 0.13              | 315.3      | 1583.4                      | 66.3                     | 0.11              |
| 2.7 V (Charge)    | 486.8      | 1358.4                      | 161.0                    | 0                 | 419.3      | 1582.2                      | 61.4                     | 0                 |
| 3.0 V (Charge)    | 387.0      | 1361.0                      | 154.2                    | 0.19              | 323.0      | 1579.0                      | 63.3                     | 0                 |
| 3.3 V (Charge)    | 288.7      | 1367.6                      | 152.3                    | 0.08              | 238.2      | 1572.1                      | 64.5                     | 0.04              |
| 3.6 V (Charge)    | 148.1      | 1375.7                      | 141.2                    | 0.19              | 110.7      | 1556.6                      | 71.3                     | 0                 |
| 3.9 V (Charge)    | 248.7      | 1375.6                      | 163.1                    | 0.36              | 184.9      | 1555.5                      | 57.7                     | 0                 |
| 3.6 V (Discharge) | 55.9       | 1385.3                      | 157.0                    | 1                 | 20.6       | 1544.3                      | 39.3                     | 0                 |
| 3.3 V (Discharge) | 44.8       | 1385.8                      | 153.4                    | 1                 | 12.4       | 1541.6                      | 30.8                     | 0                 |
| 3.0 V (Discharge) | 62.5       | 1361.1                      | 214.7                    | 1                 | 9.4        | 1540.4                      | 27.2                     | 0                 |
| 2.7 V (Discharge) | 112.6      | 1365.8                      | 142.0                    | 1                 | 61.3       | 1550.0                      | 70.9                     | 0                 |
| 2.4 V (Discharge) | 218.6      | 1358.7                      | 137.0                    | 1                 | 123.6      | 1569.4                      | 65.1                     | 0                 |
| 2.1 V (Discharge) | 331.9      | 1357.2                      | 139.2                    | 0.71              | 245.5      | 1575.7                      | 58.3                     | 0                 |

**Table S3** Calculated parameters in curve fitting analysis based on *pseudo*-Voigt function, as representative 3 data used for curve fitting analysis

|                 | D-band                  |                             |                          |                      | G-band                  |                             |                          |                   |
|-----------------|-------------------------|-----------------------------|--------------------------|----------------------|-------------------------|-----------------------------|--------------------------|-------------------|
|                 | Height / -              | Position / cm <sup>-1</sup> | Width / cm <sup>-1</sup> | Lorentz ratio / -    | Height / -              | Position / cm <sup>-1</sup> | Width / cm <sup>-1</sup> | Lorentz ratio / - |
| Pristine        | 93.6<br>185.7<br>173.7  | 1355.4<br>1350.0<br>1355.8  | 180.1<br>168.9<br>172.3  | 0.14<br>0.37<br>0.27 | 81.1<br>155.2<br>151.9  | 1580.5<br>1575.9<br>1580.9  | 63.5<br>65.0<br>64.1     | 0<br>0<br>0       |
| 15% (Charge)    | 132.4<br>113.7<br>116.0 | 1353.5<br>1357.2<br>1353.3  | 159.4<br>133.5<br>129.2  | 1<br>0.88<br>0.84    | 81.9<br>86.6<br>95.0    | 1581.8<br>1586.7<br>1583.8  | 66.0<br>72.4<br>63.8     | 0<br>0.01<br>0    |
| 29% (Charge)    | 93.4<br>159.2<br>89.8   | 1360.0<br>1360.2<br>1357.2  | 156.0<br>156.0<br>133.5  | 0.39<br>0.16<br>0.36 | 84.8<br>149.4<br>83.4   | 1588.4<br>1586.7<br>1583.4  | 65.4<br>66.0<br>68.7     | 0<br>0<br>0       |
| 44% (Charge)    | 226.0<br>243.0<br>276.4 | 1357.8<br>1353.4<br>1355.8  | 149.8<br>146.6<br>140.6  | 0.28<br>0.55<br>0.42 | 214.0<br>208.5<br>244.2 | 1584.4<br>1587.6<br>1585.7  | 65.2<br>66.4<br>66.9     | 0<br>0<br>0       |
| 59% (Charge)    | 131.0<br>152.2<br>128.5 | 1359.9<br>1357.1<br>1359.1  | 147.4<br>146.6<br>135.2  | 0.13<br>0.32<br>0.64 | 127.7<br>138.3<br>110.9 | 1587.9<br>1587.7<br>1587.5  | 66.1<br>68.8<br>67.9     | 0<br>0<br>0       |
| 73% (Charge)    | 121.8<br>197.3<br>172.0 | 1359.0<br>1355.8<br>1357.9  | 149.2<br>142.7<br>138.7  | 0.35<br>0.38<br>0.49 | 110.7<br>176.7<br>150.7 | 1589.2<br>1586.9<br>1587.0  | 66.3<br>66.9<br>67.1     | 0<br>0<br>0       |
| 100% (Charge)   | 410.3<br>427.7<br>215.6 | 1348.3<br>1346.6<br>1348.3  | 117.3<br>95.2<br>120.7   | 0.43<br>1<br>0.28    | 386.7<br>349.7<br>200.9 | 1582.9<br>1583.0<br>1584.6  | 65.9<br>66.3<br>66.2     | 0<br>0.02<br>0    |
| 58% (Discharge) | 169.0<br>106.4<br>163.1 | 1360.5<br>1359.2<br>1360.2  | 186.4<br>133.2<br>148.5  | 0.15<br>0.63<br>0.32 | 148.9<br>106.4<br>141.2 | 1582.7<br>1586.8<br>1586.9  | 59.8<br>66.9<br>64.2     | 0<br>0<br>0       |
| 15% (Discharge) | 242.1<br>124.2<br>68.7  | 1370.3<br>1376.7<br>1371.6  | 160.4<br>154.0<br>156.6  | 0.32<br>0.62<br>0.27 | 193.0<br>79.0<br>53.4   | 1587.0<br>1592.0<br>1596.4  | 65.3<br>65.8<br>58.8     | 0.30<br>0<br>0    |
| 0% (Discharge)  | 135.9<br>126.6<br>151.7 | 1368.6<br>1366.3<br>1364.7  | 200.8<br>150.2<br>162.9  | 0.52<br>0.71<br>0.73 | 74.3<br>97.0<br>106.0   | 1587.3<br>1589.5<br>1589.1  | 70.1<br>65.4<br>62.6     | 0<br>0<br>0       |
